# Genomic signatures accompanying the dietary shift to phytophagy in polyphagous beetles

Mathieu Seppey, Panagiotis Ioannidis, Brent C. Emerson, Camille Pitteloud, Marc Robinson-Rechavi, Julien Roux, Hermes E. Escalona, Duane D. McKenna, Bernhard Misof, Seungwan Shin, Xin Zhou, Robert M. Waterhouse\*, Nadir Alvarez\*

MS: Department of Ecology & Evolution, University of Lausanne, 1015 Lausanne, Switzerland. Present address: Department of Genetic Medicine and Development, University of Geneva and Swiss Institute of Bioinformatics, rue Michel-Servet 1, 1211 Geneva, Switzerland. ORCID: 0000-0003-3248-011X.

PI: Department of Genetic Medicine and Development, University of Geneva and Swiss Institute of Bioinformatics, rue Michel-Servet 1, 1211 Geneva, Switzerland. Present address: Institute of Molecular Biology and Biotechnology, Foundation for Research and Technology - Hellas, N. Plastira 100, Vassilika Vouton, 70013 Heraklion, Greece. ORCID: 0000-0003-0939-6745.

BCE: Island Ecology and Evolution Research Group, Instituto de Productos Naturales y Agrobiología (IPNA-CSIC), Avda. Astrofísico Francisco Sánchez 3, 38206 San Cristóbal de la Laguna, Santa Cruz de Tenerife, Spain. School of Biological Sciences, University of East Anglia, Norwich Research Park, Norwich NR4 7TJ, UK.

CP: Department of Ecology & Evolution, University of Lausanne, 1015 Lausanne, Switzerland. Present address: Dep. of Environmental Systems Science, ETHZ, Universitätstrasse 16, 8092 Zurich

MRR: Department of Ecology & Evolution, University of Lausanne, and Swiss Institute of Bioinformatics, 1015 Lausanne, Switzerland. ORCID: 0000-0002-3437-3329.

JR: Department of Ecology & Evolution, University of Lausanne, and Swiss Institute of Bioinformatics, 1015 Lausanne, Switzerland. Present address: Department of Biomedicine, University of Basel, Basel, Switzerland. ORCID: 0000-0002-4192-5099.

HEE: Center for Molecular Biodiversity Research (ZMB), Zoological Research Museum Alexander Koenig, Adenauerallee 160, D-53113 Bonn, Germany

DDM: Department of Biological Sciences. University of Memphis, 3700 Walker Ave., Memphis TN, U.S.A. ORCID: 0000-0002-7823-8727.

BM: Center for Molecular Biodiversity Research (ZMB), Zoological Research Museum Alexander Koenig, Adenauerallee 160, D-53113 Bonn, Germany

SS: Department of Biological Sciences. University of Memphis, 3700 Walker Ave., Memphis TN, U.S.A. ORCID: 0000-0002-4258-8661

XZ: Department of Entomology, College of Plant Protection, China Agricultural University, Beijing, China 100093. ORCID: 0000-0002-1407-7952.

RMW: Department of Ecology & Evolution, University of Lausanne, and Swiss Institute of Bioinformatics, 1015 Lausanne, Switzerland. ORCID: 0000-0003-4199-9052

NA: Department of Ecology & Evolution, University of Lausanne, 1015 Lausanne, Switzerland, and Museum of Natural History of the City of Geneva, 1 Rte de Malagnou, 1208 Genève, Switzerland. ORCID: 0000-0002-0729-166X.

\* These authors contributed to the work equally

Corresponding authors: [robert.waterhouse@unil.ch](mailto:robert.waterhouse@unil.ch), [nadir.alvarez@ville-ge.ch](mailto:nadir.alvarez@ville-ge.ch)

55 **Abstract**

56

57 The diversity and evolutionary success of beetles (Coleoptera) are proposed to have arisen from  
58 millions of years of specialized trophic interactions with land plants. In particular, ingestion of toxic plant  
59 allelochemicals may impose selective pressures that drive genomic diversification and speciation in  
60 phytophagous beetles. However, evidence of changes in beetle gene repertoires driven by these  
61 interactions remains largely anecdotal and without explicit hypothesis testing. To address this, we  
62 explored the genomic consequences of beetle-plant trophic interactions by performing comparative  
63 gene family analyses across 18 species representing the two most speciose beetle suborders. By  
64 contrasting gene content of species from the phytophagous-rich suborder Polyphaga with those of the  
65 mainly predatory Adephaga, we identified families of detoxification enzymes that underwent adaptive  
66 expansions in Polyphaga. These genomic signatures that accompany the dietary shift to phytophagy in  
67 polyphagous beetles suggest a key role for interactions with plant chemical defenses in driving beetle  
68 diversification.

## 69 Introduction

70

71 Species richness among eukaryotes varies substantially, with some clades having only a few  
72 representatives and others comprising hundreds of thousands of extant species. In particular, the class  
73 Insecta outnumbers all other classes with more than half of all described extant species (Farrell, 1998;  
74 Grimaldi and Engel, 2005). Beetles (Coleoptera) encompass approximately 380,000 described species,  
75 representing ca. 40% of described insect diversity (Slipinski et al., 2011). Several hypotheses have  
76 been proposed to explain this richness, notably their complex interactions with flowering plants (Farrell,  
77 1998; Leschen and Buckley, 2007; McKenna et al., 2009, 2015; Zhang et al., 2018) and a high lineage  
78 survival rate (Hunt et al., 2007). Nevertheless, detailed supporting evidence from molecular genetic  
79 studies remains sparse, making it difficult to assess the relative importance of these and other  
80 potentially important contributing factors (Barracough et al., 1998; Suchan and Alvarez, 2015).

81

82 The remarkable evolutionary success of beetles may have been driven by the interplay between their  
83 trophic niche and their genomic content and architecture. This is based on the premise that  
84 environmental and ecological conditions are likely to be predominant factors influencing the fate of  
85 genetic variation in populations under natural selection (Barrick and Lenski, 2013), eventually driving  
86 divergence into distinct species (Seehausen et al., 2014). Among all components of the biotic  
87 environment, the trophic niche (principal source of nourishment) of an organism plays a crucial role in  
88 shaping the evolution of phenotypic innovations and their underlying genomic changes, e.g. feeding  
89 modes in cichlid fishes (Parsons et al., 2016), mouth development in *Pristionchus* nematodes (Ragsdale  
90 et al., 2013), and bitter taste receptors in vertebrates (Li and Zhang, 2014). Among several hypotheses  
91 explaining the tremendous diversity among beetles, a shift from an ancestral diet as saprophages  
92 (detritus-feeding) or mycophages (fungi-feeding) (Betz et al., 2003) to phytophagy (feeding on living  
93 plant material in a broad sense) is often evoked (Farrell, 1998; Leschen and Buckley, 2007; McKenna  
94 et al., 2009). While the suborder Adephaga (~45,000 species) comprises mostly predatory species,  
95 including ground beetles and diving beetles, the largest beetle suborder, Polyphaga (~315,000), is  
96 predominantly comprised of phytophagous clades, among which the most species-rich families are  
97 weevils (Curculionidae, ~51,000), longhorn beetles (Cerambycidae, ~30,000), and leaf beetles  
98 (Chrysomelidae, ~32,000) (Slipinski et al., 2011). Phytophagy appeared approximately 425 million

99 years ago, quickly after terrestrial life was established (Labandeira, 2002). It progressively diversified  
100 to target most plant tissues (Labandeira, 2013), shortly before the radiation of flowering plants 120-100  
101 million years ago (Grimaldi, 1999). In response, plants have evolved diverse strategies to protect  
102 themselves, which in turn impose selective pressures on the animals that feed on them.

103

104 While many biological processes are likely to play a role in this evolutionary battle, a key weapon in the  
105 arsenal of phytophagous insects' adaptations is their ability to neutralize or minimize the effects of plant  
106 secondary compounds. Protein families known to be crucial for eliminating harmful plant toxins are  
107 cytochrome P450 monooxygenases (P450s), carboxylesterases (CEs), UDP-glycosyltransferases  
108 (UGTs), and glutathione S-transferases (GSTs) (Voelckel and Jander, 2014). While P450s and CEs  
109 modify residues to make compounds more hydrophilic, UGTs and GSTs conjugate xenobiotic  
110 compounds to hydrophilic molecules. Detoxification is completed by membrane transporters, such as  
111 ATP-binding cassette (ABCs) transporters, which move xenobiotic compounds to where they can either  
112 be excreted, or less frequently sequestered in order to be reused as a defense mechanism (Voelckel  
113 and Jander, 2014). Additionally, to prevent phytophagous insects from digesting their tissues, plants  
114 produce enzyme inhibitors that block catalytic sites or compete with the substrates of enzymes involved  
115 in digestion. The major families affected are endopeptidases, such as cysteine, and serine proteases,  
116 as well as more specific enzymes such as glycoside hydrolases (GHs), certain types of which are able  
117 to break down polysaccharide molecules, including cellulose, hemicellulose and pectin in plant cell walls  
118 (McKenna et al., 2016; Pauchet et al., 2010). Other adaptations to phytophagy include repertoires of  
119 chemoreceptors that are crucial for finding appropriate food sources (Goldman-Huertas et al., 2015),  
120 and the specialization of mouthparts in response to plant mechanical barriers, which are highly  
121 diversified in insects (Labandeira, 1997).

122

123 As lineages diverge, their genomes accumulate changes, some of which are expected to be directly  
124 linked to functional adaptations. Identifying such genomic features and linking them to phenotypic  
125 differences, whilst robustly distinguishing between the effects of stochastic changes and natural  
126 selection (Hurst, 2009), is critical to deciphering the genomic drivers of species radiations (Shaw and  
127 Lesnick, 2009). Changes include point substitutions, which may affect existing functional elements, but  
128 also larger-scale changes such as duplications, from individual genes to entire genomes, which by  
129 adding new members to the repertoires of key gene families may constitute an ideal mechanism to

130 facilitate the emergence of novel functions leading to successful phytophagy (Kondrashov, 2012).  
131 Whereas newly generated gene copies are usually redundant or deleterious and pseudogenized,  
132 rendering the gene copy non-functional (Innan and Kondrashov, 2010), they are sometimes maintained.  
133 Particularly interesting cases of gene family expansions are the ones restricted to specific lineages,  
134 resulting in lineage specific expansion (LSE). Evolutionary mechanisms causing LSE are numerous  
135 and not all adaptive (see Innan and Kondrashov, 2010 for a comprehensive review). However,  
136 duplicated gene copies may provide an immediate selective advantage and be maintained by selection.  
137 This can be due to an increased dosage of the gene, or to changes following the duplication being  
138 selected in one gene copy but not the other, which might allow evolution towards a different function in  
139 so-called neo-functionalization processes. Enzymes are considered particularly relevant candidates for  
140 such evolutionary processes as they could expand their range of substrates (Francino, 2005).

141

142 Here we apply a comparative genomics approach to examine the evolution of genes putatively involved  
143 in plant-insect interactions by sampling from the two largest beetle suborders, which, generally-  
144 speaking, present contrasting trophic niches. We contrast exemplars from the characteristically  
145 predaceous Adephaga with exemplars from Polyphaga and we hypothesize that plant-insect  
146 interactions during the dietary shift to phytophagy should be accompanied by genomic evolutionary  
147 signatures visible at the subordinal scale. Using genomic and transcriptomic data from 18 beetle  
148 species, we estimate ancestral gene family content, taking into account gene gains and losses across  
149 the species phylogeny, to identify significant LSEs of gene families related to phytophagy and  
150 signatures of adaptive expansions in these families. Ignoring sensory receptors, as their evolution might  
151 be driven by agents other than those related strictly to trophic niche (Brito et al., 2016), and  
152 morphological genes, as their inferred association with diet is less robust, we focus on genes coding  
153 for enzymes, for which adaptive LSE specific to Polyphaga would suggest a role for detoxification and  
154 digestive pathways in driving adaptation and speciation.

## 155 **Results**

### 156 *A representative sampling of the two major coleopteran suborders*

157 Reliable estimation of gene gain and loss events requires a robust evolutionary framework, i.e. a  
158 phylogeny that includes the species studied, as well as the characterization of gene families across  
159 complete gene sets from these same species. To study adaptation to phytophagy, we sampled from  
160 both Adephaga (mostly predaceous) and Polyphaga (with diverse trophic habits, including a very large  
161 number of phytophagous species). A balanced sampling of each suborder was achieved comprising  
162 twelve transcriptomes and six genomes, with Benchmarking Universal Single-Copy Ortholog (BUSCO)  
163 completeness estimates (Simão et al., 2015; Waterhouse et al., 2018) ranging from 71.9% to 97%  
164 (Figure 1, Table 1). The species phylogeny was estimated using 405 BUSCO genes found to be  
165 complete in all species and the strepsipteran outgroup, *Stylops melittae* (Figure 1). Protein-coding  
166 sequence predictions ranged from 9,844 to 24,671 genes per beetle species. These sequences  
167 matched 14,908 Arthropoda orthologous groups (OGs) containing at least one species of Coleoptera  
168 in the OrthoDB v8 catalogue (Kriventseva et al., 2015). This represented a minimum of 6,742 and a  
169 maximum of 11,149 OGs for *Carabus frigidus* and *Leptinotarsa decemlineata*, respectively. OGs  
170 containing genes from only one of the two sampled suborders were excluded, resulting in a total of  
171 9,720 OGs for the analysis that have evolutionary histories traceable to the last common ancestor of  
172 beetles. Functional annotations of the sequences within these OGs were used to identify and assign  
173 several of them to enzyme families relevant to the tested hypothesis. These candidate OGs comprised  
174 four UGTs, 22 P450s, 19 CEs, six GSTs, four SERs, seven CYs, 28 ABCs, and one GH, for a total of  
175 91 candidate OGs from eight families of genes (i.e. functional categories) (Table 2).

176 **Table 1.** Beetle genomes and transcriptomes included in the study. Taxonomic classifications are listed with data sources, as well as completeness (Benchmarking  
 177 Universal Single-Copy Ortholog, BUSCO, score, C=Complete, S=Complete Single-Copy, D=Complete Duplicated, F=Fragmented, M=Missing), number of predicted  
 178 proteins, and number of orthologous groups (OGs) with genes from each species. The outgroup species used in the phylogeny, *Stylops melittae*, belongs to the order  
 179 Strepsiptera, which is the sister group of Coleoptera (Niehuis et al., 2012).

| Species                           | Short form | Suborder  | Family        | Type of assembly | Accession              | Bioproject  | Source                                              | BUSCO score (1658 genes)                | Predicted proteins | OrthoDB groups (OG) |
|-----------------------------------|------------|-----------|---------------|------------------|------------------------|-------------|-----------------------------------------------------|-----------------------------------------|--------------------|---------------------|
| <i>Cicindela hybrida</i>          | CHYBR      | Adephaga  | Carabidae     | Transcriptome    | GDMH01000000           | PRJNA286505 | 1KITE, this study                                   | C:90.4[S:84.9%,D:5.5%],F:3.4%,M:6.2%    | 13,916             | 8,111               |
| <i>Calosoma frigidum</i>          | CFRIG      | Adephaga  | Carabidae     | Transcriptome    | GDLF01000000           | PRJNA286499 | 1KITE, this study                                   | C:78.3[S:73.5%,D:4.8%],F:9.8%,M:11.9%   | 9,844              | 6,742               |
| <i>Elaphrus aureus</i>            | EAURE      | Adephaga  | Carabidae     | Transcriptome    | GDPI01000000           | PRJNA286520 | 1KITE, this study                                   | C:92.4[S:85.9%,D:6.5%],F:2.2%,M:5.4%    | 12,808             | 8,020               |
| <i>Noterus clavicornis</i>        | NCLAV      | Adephaga  | Noteridae     | Transcriptome    | GDNA01000000           | PRJNA286561 | 1KITE, this study                                   | C:90.9[S:84.1%,D:6.8%],F:4.4%,M:4.7%    | 12,981             | 7,918               |
| <i>Haliplus fluviatilis</i>       | HFLUV      | Adephaga  | Haliplidae    | Transcriptome    | GDMW01000000           | PRJNA286525 | 1KITE, this study                                   | C:91.8[S:76.3%,D:15.5%],F:4.3%,M:3.9%   | 19,408             | 8,528               |
| <i>Cybister lateralmarginalis</i> | CLATE      | Adephaga  | Dytiscidae    | Transcriptome    | GDLH01000000           | PRJNA286512 | 1KITE, this study                                   | C:88.2[S:83.1%,D:5.1%],F:3.7%,M:8.1%    | 13,916             | 7,256               |
| <i>Sinaspidytes wrasei</i>        | SWRAS      | Adephaga  | Aspidytidae   | Transcriptome    | GDNH01000000           | PRJNA286492 | 1KITE, this study                                   | C:87.0[S:76.7%,D:10.3%],F:4.0%,M:9.0%   | 13,392             | 7,721               |
| <i>Dineutes sp.</i>               | DINEU      | Adephaga  | Gyrinidae     | Transcriptome    | GDNB01000000           | PRJNA286516 | 1KITE, this study                                   | C:71.9[S:51.6%,D:20.3%],F:13.6%,M:14.5% | 14,644             | 7,089               |
| <i>Gyrinus marinus</i>            | GMARI      | Adephaga  | Gyrinidae     | Transcriptome    | GAUY01000000           | PRJNA219564 | 1KITE, Misof et al., 2014                           | C:81.5[S:79.0%,D:2.5%],F:8.1%,M:10.4%   | 13,867             | 7,663               |
| <i>Aleochara curtula</i>          | ACURT      | Polyphaga | Staphylinidae | Transcriptome    | GATW01000000           | PRJNA219522 | 1KITE, Misof et al., 2014                           | C:91.4[S:87.5%,D:3.9%],F:4.0%,M:4.6%    | 20,280             | 8,513               |
| <i>Anoplophora glabripennis</i>   | AGLAB      | Polyphaga | Cerambycidae  | Genome           | GCF_000390285          | PRJNA167479 | I5k, McKenna et al., 2016                           | C:96.9[S:95.8%,D:1.1%],F:2.7%,M:0.4%    | 22,035             | 10,959              |
| <i>Agrilus planipennis</i>        | APLAN      | Polyphaga | Buprestidae   | Genome           | GCF_000699045          | PRJNA230921 | I5k, unpublished                                    | C:92.5[S:91.2%,D:1.3%],F:4.5%,M:3.0%    | 15,497             | 9,089               |
| <i>Dendroctonus ponderosae</i>    | DPOND      | Polyphaga | Curculionidae | Genome           | GCF_000355655          | PRJNA162621 | Keeling et al., 2013                                | C:91.2[S:86.0%,D:5.2%],F:4.1%,M:4.7%    | 13,457             | 8,518               |
| <i>Leptinotarsa decemlineata</i>  | LDECE      | Polyphaga | Chrysomelidae | Genome           | GCF_000500325          | PRJNA171749 | I5k, Schoville et al., 2018                         | C:88.9[S:87.5%,D:1.4%],F:9.9%,M:1.2%    | 24,671             | 11,149              |
| <i>Laparocerus tessellatus</i>    | LTESS      | Polyphaga | Curculionidae | Transcriptome    | 10.5281/zenodo.1336288 | N/A         | This study                                          | C:93.8[S:91.9%,D:1.9%],F:1.4%,M:4.8%    | 18,448             | 8,616               |
| <i>Meloe violaceus</i>            | MVIOL      | Polyphaga | Meloidae      | Transcriptome    | GATA01000000           | PRJNA219578 | 1KITE, Misof et al., 2014                           | C:90.3[S:85.6%,D:4.7%],F:5.9%,M:3.8%    | 14,295             | 8,480               |
| <i>Onthophagus taurus</i>         | OTAUR      | Polyphaga | Scarabaeidae  | Genome           | GCF_000648695          | PRJNA167478 | I5k, unpublished                                    | C:96.2[S:93.9%,D:2.3%],F:2.5%,M:1.3%    | 17,483             | 9,315               |
| <i>Tribolium castaneum</i>        | TCAST      | Polyphaga | Tenebrionidae | Genome           | GCF_000002335          | PRJNA12540  | Tribolium Genome Sequencing Consortium et al., 2008 | C:97.0[S:96.5%,D:0.5%],F:1.6%,M:1.4%    | 16,645             | 9,429               |
| <i>Stylops melittae</i>           | SMELI      | Outgroup  | Stylopidae    | Transcriptome    | GAZM02000000           | PRJNA219603 | 1KITE, Misof et al., 2014                           | C:76.5[S:55.0%,D:21.5%],F:7.1%,M:16.4%  | 13,026             | 6,104               |

181 **Table 2.** Candidate gene categories with the keywords and identifiers used to select them from the full  
 182 sets of sequences annotated with InterProScan. To be included as candidate orthologous groups (OGs)  
 183 in the category, OGs were required to have at least one sequence matching both a UniRef and an  
 184 InterProScan entry, and an additional gene ontology term in the case of serine proteases.

185

| Category                          | InterProScan (Pfam or InterPro identifiers) or gene ontology | UnifRef KeyWord                                                                              | Number of OGs |
|-----------------------------------|--------------------------------------------------------------|----------------------------------------------------------------------------------------------|---------------|
| UDP-glycosyltransferases (UGTs)   | PF00201                                                      | name:"cluster UDP glucuronosyltransferase" OR name:"cluster UDP glycosyltransferase"         | 4             |
| Cytochrome P450 oxidases (P450s)  | PF00067                                                      | name:"cluster Cytochrome P450"                                                               | 22            |
| Carboxylesterases (CEs)           | PF02230, PF00135                                             | name:"cluster carboxylesterase" OR name:"carboxylic ester hydrolase"                         | 19            |
| Glutathione S-transferases (GSTs) | PF00043, PF02798                                             | name:"cluster Glutathione S-transferase"                                                     | 6             |
| Serine proteases (SERs)           | PF00450,PF12146, PF05577,GO:0008236                          | name:"cluster Serine protease" OR name:"cluster Serine peptidase"                            | 4             |
| Cysteine proteases (CYSs)         | PF00112                                                      | name:"cluster cysteine protease" OR name:"cluster cystein protease" OR name:"cluster Papain" | 7             |
| ABC transporters (ABCs)           | PPF00005, PF00664                                            | name:"cluster ABC"                                                                           | 28            |
| Glycoside hydrolases (GHs)        | IPR000334, IPR000743, IPR001360, IPR001547                   | name:"cluster Glycoside hydrolase"                                                           | 1             |
| <b>Total</b>                      |                                                              |                                                                                              | <b>91</b>     |

186



187 *Polyphaga exhibit more frequent gains across a larger set of OGs*

188 Analysis of per-species gene counts of the complete set of 9,720 OGs was performed with the  
189 Computational Analysis of gene Family Evolution (CAFE v3) (Han et al., 2013) tool. The mode  
190 considering distinct gene gain ( $\lambda=0.0019$  gain/gene/million years) and gene loss ( $\mu=0.0018$   
191 loss/gene/million years) was preferred over a single value for  $\lambda$  and  $\mu$ , having a significantly greater  
192 maximum likelihood score (see Methods). The  $\lambda$  (gain) and  $\mu$  (loss) values predicted when CAFE was  
193 run on each suborder separately were  $\lambda=0.0020$  and  $\mu=0.0027$  for Adephaga, versus  $\lambda=0.0023$  and  
194  $\mu=0.0021$  for Polyphaga, showing a tendency for Adephaga to lose genes and for Polyphaga to gain  
195 genes. Among the 9,720 OGs were 21 with reported expansions originating at the Adephaga root and  
196 126 at the Polyphaga root (see [Figure 1](#) to locate the nodes). Conversely, 240 OGs showed gene losses  
197 for Adephaga and 354 for Polyphaga. Two expansions and 21 losses affected the candidate OGs for  
198 Adephaga, and nine expansions and six losses for Polyphaga. Other polyphagan nodes leading to  
199 polyphagous-rich clades (i.e., Chrysomeloidea and Curculionidae) also exhibited more candidate OGs  
200 expanding than contracting ([Figure 1](#)). All counts of gene gains and losses per node are presented in  
201 [Supplementary Figures 1 and 2](#). Additionally, CAFE assigned individual OG p-values of  $< 0.01$  to a  
202 subset of 910 (9.3%) OGs, which, according to De Bie et al., 2006, indicates gene families likely to have  
203 experienced accelerated rates of gain and loss. These are interesting to investigate further as they may  
204 represent large OGs of potentially unequal size between the suborders. Among these were 26 of the  
205 91 candidate OGs (28.6%), a significantly larger proportion (2-sample test for equality of proportions,  
206 chi-square test, p-value  $< 0.0001$ ) compared with just 9.3% of non-candidate OGs.

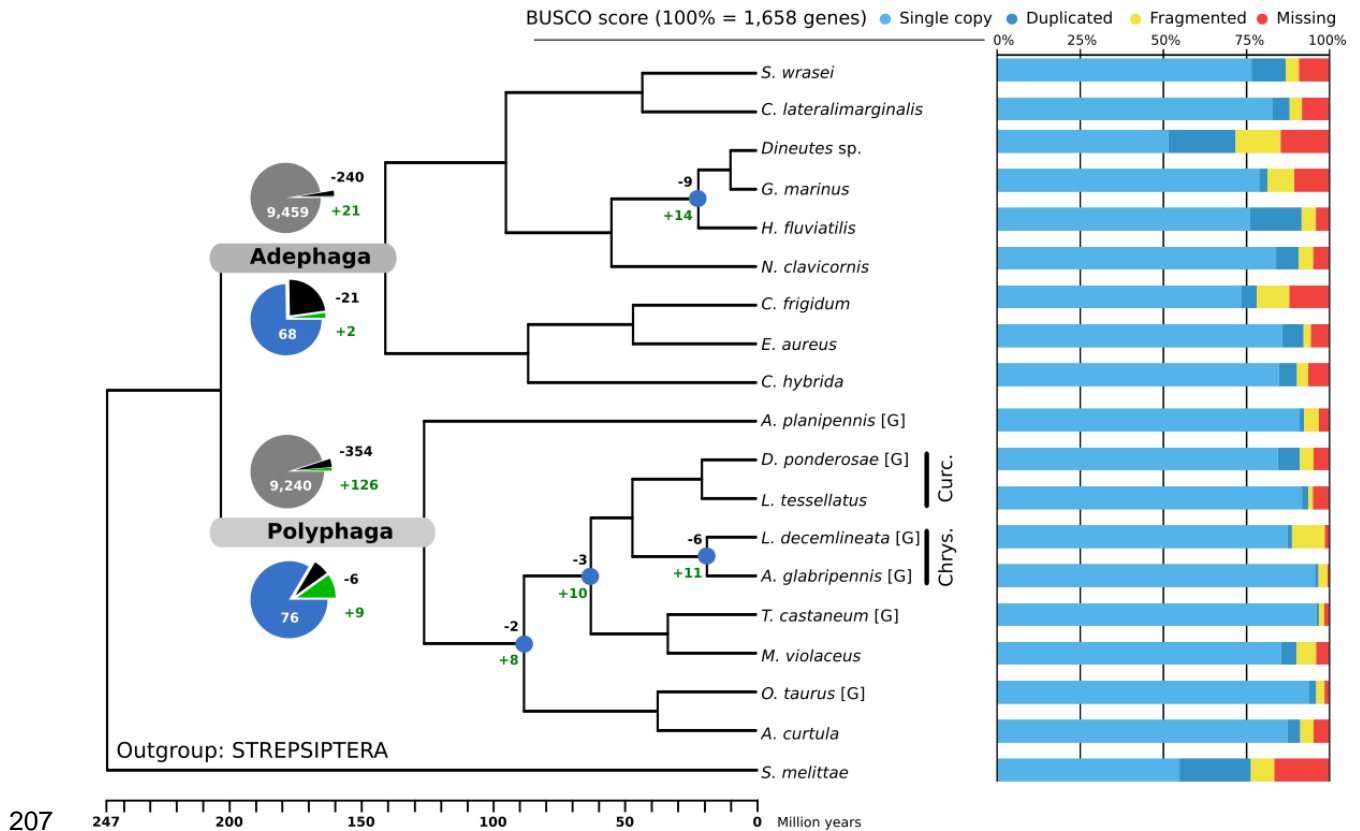

207

208

209 **Figure 1.** The ultrametric species phylogeny with gene family expansions and contractions quantified  
210 for nodes of interest and bar charts showing completeness of the genomic and transcriptomic datasets  
211 studied. The species tree was built from 405 single-copy orthologs and constrained to have  
212 Geadephaga (*C. frigidum*, *E. aureus*, *C. hybridia*) and Hydradephaga (the six other Adephaga) as  
213 monophyletic sister clades (e.g., following McKenna et al., 2015). Branch lengths are scaled in millions  
214 of years. Maximum likelihood bootstrap support was 99 or 100% for all branches. [G] symbol indicates  
215 data from species with sequenced genomes with the remaining species being from transcriptomes. The  
216 numbers of orthologous groups (OGs) with expansions (+) and contractions (-) are displayed at the root  
217 node of each suborder. Pie charts show proportions of OGs with gene losses (black) and gene gains  
218 (green) with respect to OGs with no significant losses or gains for all considered OGs (grey) and only  
219 the candidate OGs (blue). While gains constitute only a small subset of all OGs in both suborders, the  
220 proportion of gains is much larger among candidate OGs in Polyphaga. The nodes indicated by blue  
221 circles in the Polyphaga sub-tree lead to species-rich clades containing species that are largely  
222 phytophagous (e.g., Chrysomelidae and Curculionidae, respectively Chrys. and Curc.) and experienced  
223 larger proportions of gains among the candidate OGs. The Benchmarking Universal Single-Copy  
224 Ortholog (BUSCO) scores indicate the relative levels of completeness and putative gene duplications  
225 for the genome-based and transcriptome-based datasets in terms of 1,658 BUSCOs from the  
226 insecta\_odb9 assessment dataset.

227 *Signatures of adaptive expansion are more prevalent in Polyphaga*

228 All 910 OGs with significant variations in their gene content were tested for signatures of adaptive  
229 expansion in each suborder, by comparing Brownian motion (BM, neutral) to Ornstein-Uhlenbeck (OU,  
230 selective pressure) evolutionary models (Beaulieu et al., 2012). As mentioned previously, these  
231 included 26 OGs that belong to one of the functional categories listed in [Table 2](#) (“candidate” OGs). The  
232 models consider per-species gene count as a trait that can evolve towards a value, which may or may  
233 not differ between the two suborders and may or may not be guided by selective pressure; we call this  
234 the “optimum” value in models integrating selection. In total, 21 OGs displayed a higher optimum for  
235 Adephaga (0.2% of the initial 9,720 OGs) and 88 for Polyphaga (0.9%). Eight of these 88 polyphagan  
236 OGs ([Table 3](#) and gene trees in [Figure 2](#) and [Supplementary Figures 3-9](#)) are candidate OGs belonging  
237 to one of the candidate gene families of [Table 2](#), while none of the 21 adephagan OGs belong to any  
238 of the candidate gene families. The proportion of OGs with expansions and higher optima in the  
239 background (all “candidate” and remaining “control” OGs) was significantly larger for Polyphaga  
240 compared to Adephaga (2-sample test for equality of proportions, chi-squared, 88/9720 vs. 21/9720, p-  
241 value < 1e-09), indicating that Polyphaga have experienced globally more LSE under selection on  
242 protein-coding genes. Furthermore, a test for enrichment (see Methods) of OGs with LSE under  
243 selection from the candidate families ([Table 2](#)) compared to the background was significant for  
244 Polyphaga (8/91 vs. 88/9720, p-value < 1e-09). The same test applied individually on each candidate  
245 gene family within the candidate dataset demonstrated that categories enriched for LSE under selection  
246 in Polyphaga were GSTs (3/6 positive tests, fdr-corrected p-value < 1e-09) and CEs (3/19, fdr-corrected  
247 p-value < 0.005), as shown in detail in [Table 4](#).

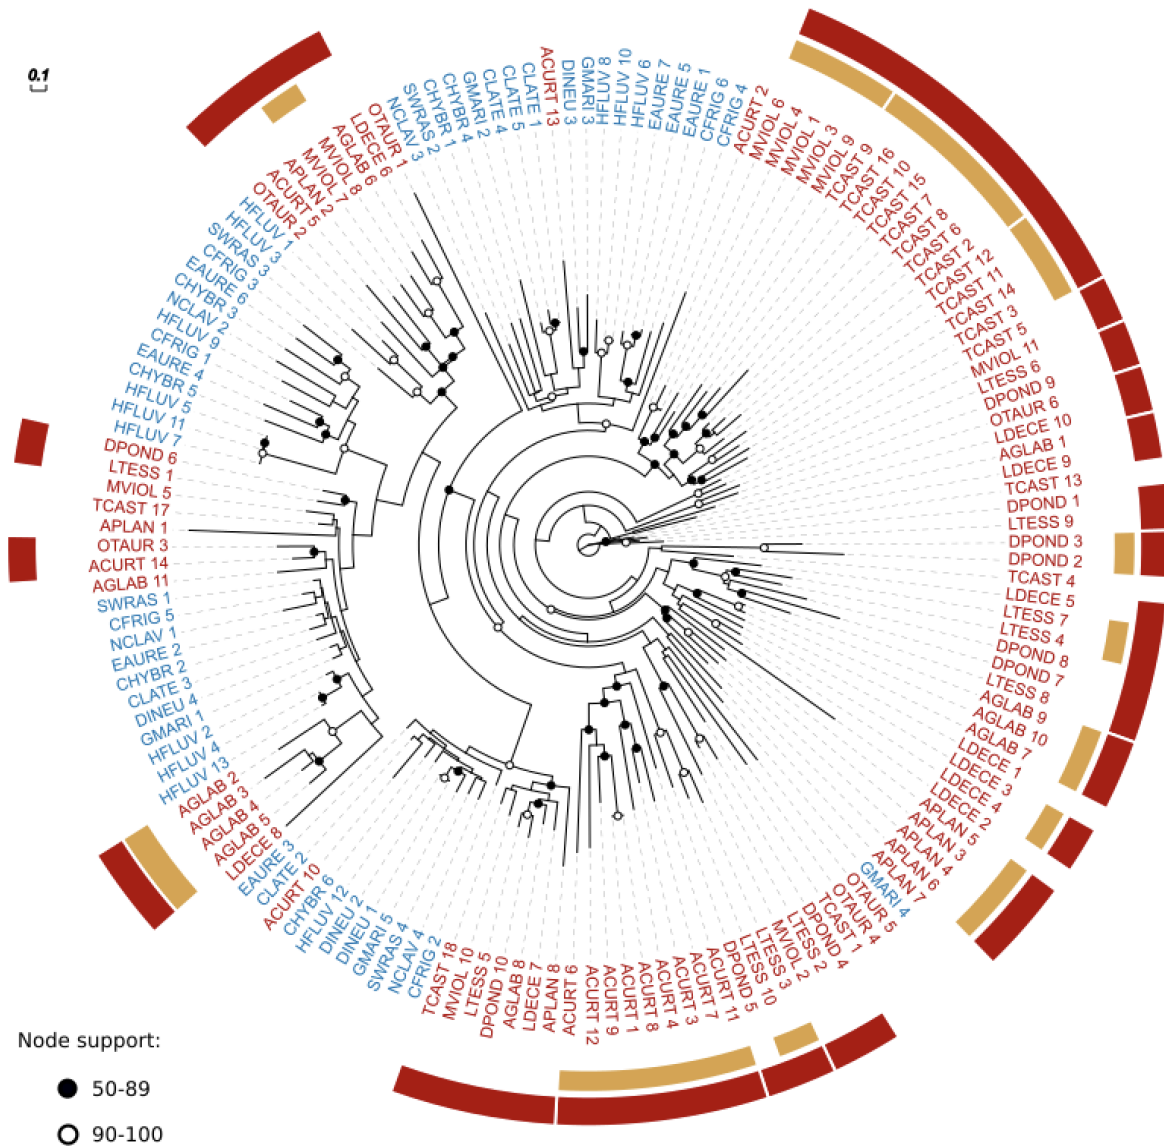

248

249

250 **Figure 2.** Molecular phylogeny from the largest glutathione S-transferase (GST) orthologous group  
 251 among those exhibiting lineage-specific expansions driven by selection. Red labels indicate genes  
 252 belonging to species of Polyphaga, accounting for 98 out of 152 genes (their Ornstein-Uhlenbeck per-  
 253 species optimum is 11.69 vs. 6.85 for Adephaga (blue labels), see [Table 3](#)). The presence of several  
 254 clades of polyphagan and adephagan genes delineates duplication events following the divergence of  
 255 the two suborders. Encircling the gene labels are red bars that highlight polyphagan clades with  
 256 bootstrap support of >50% and yellow bars that highlight intra-specific duplications with bootstrap  
 257 support of >50%. Corresponding full names of species are given in [Table 1](#). Branch lengths represent  
 258 substitutions per site and bootstrap support below 50% is not displayed.

259

260 **Table 3.** Candidate orthologous groups (OGs) with CAFE overall p-values  $p < 0.01$  for which a model  
 261 favoring selection for larger sizes in Polyphaga showed a greater likelihood. OG identifiers for functional  
 262 category cytochrome P450s (P450), carboxylesterases (CE), glutathione S-transferases (GST), and  
 263 cysteine proteases (CYS) are from OrthoDB v8 (ODB8 ID). Small-sample-size corrected Akaike  
 264 Information Criterion (AICc) values are reported for all tested models. BM1 (Brownian motion with a  
 265 single rate for the whole tree), BMS (Brownian motion with different rates for each regime), OU1  
 266 (selection towards the same optimum for both regimes), all representing the null hypothesis. OUM  
 267 (selection towards two optima, same variance) and OUMV (selection towards two optima, two  
 268 variances), representing the alternative hypotheses. The mean values in each suborder (Adephaga  
 269 versus Polyphaga) are presented in the last two columns. Values in bold font indicate the preferred  
 270 (maximum likelihood) model. A delta AICc  $> 2$  is required for H1 to be retained.

271

| Category | ODB8 ID   | BM1<br>AICc<br>H0.1 | BMS<br>AICc H0.2 | OU1<br>AICc<br>H0.3 | OUM<br>AICc<br>H1.1 | OUMV<br>AICc<br>H1.2 | Mean<br>Adephaga | Mean<br>Polyphaga |
|----------|-----------|---------------------|------------------|---------------------|---------------------|----------------------|------------------|-------------------|
| P450     | EOG805VG7 | 148.37              | 153.21           | 143.35              | 148.10              | <b>137.95</b>        | 34.13            | 34.47             |
| CE       | EOG87DCWX | 143.23              | 143.77           | 143.63              | <b>138.91</b>       | 141.15               | 6.55             | 18.78             |
| CE       | EOG8KD911 | 87.08               | 91.23            | 82.90               | 89.10               | <b>79.74</b>         | 0.89             | 2.86              |
| CE       | EOG876NDC | 80.64               | 85.67            | 80.08               | 87.42               | <b>77.23</b>         | 1.72             | 3.48              |
| GST      | EOG87WR3Z | 86.24               | 87.76            | 76.05               | 74.40               | <b>72.12</b>         | 1.71             | 3.16              |
| GST      | EOG81RS7Z | 108.77              | 114.44           | 109.19              | 113.76              | <b>103.79</b>        | 6.85             | 11.69             |
| GST      | EOG85F05D | 117.62              | 115.88           | 111.53              | 107.62              | <b>106.32</b>        | 5.69             | 9.16              |
| CYS      | EOG8JDKNM | 91.85               | 91.62            | 89.74               | <b>85.66</b>        | 88.25                | 1.80             | 3.78              |

272

273

274

275 **Table 4.** Gene family category and candidate orthologous group (OG) enrichments among positive  
 276 results. The top panel presents the statistical significance of each test for enrichment of candidate gene  
 277 families among the positive results when compared to the background, for Polyphaga. The lower panel  
 278 indicates the number of positive results in both suborders, for candidate OGs and background.  
 279 Significant values at the 0.05 threshold are shown in bold.

280

| Category               | Positive/Total OGs | Category enrichment FDR                     |
|------------------------|--------------------|---------------------------------------------|
| P450                   | 1/22               | 0.36268                                     |
| CE                     | 3/19               | <b>0.00252</b>                              |
| GST                    | 3/6                | <b>0.00016</b>                              |
| CYS                    | 1/7                | 0.16627                                     |
| UGT                    | 0/4                | 1.00000                                     |
| SER                    | 0/4                | 1.00000                                     |
| ABC                    | 0/28               | 1.00000                                     |
| GH                     | 0/1                | 1.00000                                     |
| Category               | Positive/Total OGs | Candidate vs. background enrichment p-value |
| Background (Polyphaga) | 88/9,720           | <b>0</b>                                    |
| Candidates (Polyphaga) | 8/91               |                                             |
| Background (Adephaga)  | 21/9,720           | 1                                           |
| Candidates (Adephaga)  | 0/91               |                                             |

281

282

283

284

## 285 Discussion

286

287 Comparative genomic analyses often highlight expanded gene families and link these expansions to  
 288 biological functions peculiar to, or of special interest in, their focal organism(s). However, these analyses  
 289 usually do not explicitly test for any hypothesized evolutionary model that might support such links. Here  
 290 we test a specific hypothesis of adaptation to a phytophagous diet, by comparing candidate gene family  
 291 repertoires from nine adephagan (a mostly predaceous suborder) and nine polyphagan (a highly

292 phytophagous suborder) beetle species. These candidate families are putatively involved in  
293 detoxification of plant allelochemicals and digestion of plant tissues. Specifically, we identify evidence  
294 for potentially adaptive gene family expansions in the species rich Polyphaga. This result is robust to  
295 potentially confounding factors that could arise from combining genomic and transcriptomic datasets,  
296 conservative definitions of candidate gene families, or the greater species richness of the Polyphaga  
297 (see discussion points below and Supplementary Information). Through explicitly testing for adaptive  
298 LSEs, these results offer conclusive supporting evidence for the key evolutionary role of the  
299 phytophagous trophic niche in driving gene family expansions in Coleoptera (specifically Polyphaga), a  
300 feature that likely facilitated adaptation of polyphagan beetles to specialized plant feeding.

301

### 302 *Dataset heterogeneity*

303 For the comparison of gene repertoires between the two groups to be unbiased, the gene content of all  
304 analyzed species should be of similar accuracy and completeness. The number of predicted proteins  
305 for the genomic resources for each beetle species (Table 1, mean 15,977 and standard deviation 3,748)  
306 was within the range expected of insects (see Waterhouse, 2015). The average total gene count for  
307 Adephaga species (all transcriptomes) was about 4,200 fewer than for Polyphaga, which include two  
308 genomes with more than 22,000 genes. This difference in average gene counts is reduced to just 1,384  
309 when considering only genes assigned to the 9,720 OGs selected for the analysis. Our conservative  
310 orthology filtering therefore ensured that the comparisons focused on gene families with reliably  
311 traceable evolutionary histories that span both groups of beetles. Secondly, assessments of  
312 completeness showed that the majority of the datasets contained more than 90% of complete BUSCOs  
313 (Figure 1, Table 1). While the dynamically evolving families that are the focus of this study are clearly  
314 not universal single-copy orthologs, the high levels of BUSCO completeness support the assumption  
315 that the datasets represent good coverage of the species' gene content. Re-analyses of our data that  
316 exclude the two adephagan beetle species with fewer than 80% complete BUSCOs reduced the power  
317 of the model tests but nevertheless still identified the three GST OGs that favor a model with a higher  
318 optima for Polyphaga (see Supplementary Results). Three of the adephagan transcriptomes showed  
319 more than 10% of duplicated BUSCOs, which could have arisen from suboptimal filtering of the  
320 transcriptomes, i.e. failure to remove alternative transcripts of the same gene. While such potentially  
321 inflated gene counts for these adephagans might prevent the identification of some true expansions in



322 Polyphaga, they do not invalidate those that were identified. Finally, half of the OGs representing  
323 positive results showed a higher mean value for polyphagan transcriptomes than genomes, including  
324 the three GST OGs ([Supplementary Table 1](#)), and explicitly testing for effects due to using both genome  
325 and transcriptome data for the species of Polyphaga, by performing a modified OUwie analysis with  
326 data type as the regime under selection, identified only one CE (EOG8KD911) for which the favored  
327 model linked gene family expansion to species with genomes (see Supplementary Results).

328

### 329 *Candidate OG identification*

330 The annotation strategy was designed to link OGs to candidate gene families based on manually  
331 selected keywords used to filter sequence search results, as well as Pfam and InterPro identifiers ([Table](#)  
332 [2](#)), with the aim of excluding false positives (see Methods). This conservative strategy may not have  
333 fully captured all possible candidate OGs, which would therefore have remained in the background set  
334 of OGs that were used as controls. For example, we identified nine GST OGs (six were retained as  
335 candidates after filtering) while ten subclasses have been identified in arthropods (Roncalli et al., 2015).  
336 While the strict (conservative) strategy we employed to identify candidate OGs may have resulted in an  
337 underestimate of the extent of the observed effects, this does not invalidate those that were identified.  
338 In addition, filtering the OGs to retain only those with genes from both Adephaga and Polyphaga  
339 excluded from the analyses any genes that were specific to either suborder. These might include genes  
340 with key roles in phytophagy, e.g. enzymes acquired by horizontal gene transfer identified from the *A.*  
341 *planipennis*, *A. glabripennis*, and *D. ponderosae* genomes (McKenna et al., 2016). While  
342 acknowledging their importance, here we explicitly tested for adaptive LSE in one lineage versus the  
343 other so gene evolutionary histories were required to span the two suborders and thus be traceable to  
344 their last common ancestor.

345

### 346 *The more speciose Polyphaga exhibit more dynamic gene repertoire evolution*

347 The  $\mu$  and  $\lambda$  values reported by CAFE on all 9,720 OGs are consistent with assessments of other insect  
348 clades (Hahn et al., 2007; Neafsey et al., 2015). Although the overall gain rate is slightly higher than  
349 the loss rate, the number of OGs losing genes reported by CAFE at each individual node is generally  
350 larger than the number of OGs with gains. This is reconciled by considering that across Coleoptera  
351 many OGs lost a few genes while few families gained many genes. As most OGs display a low number



352 of genes per species, i.e. they are evolving under 'single-copy control' (Waterhouse et al., 2011), losing  
353 more than one ortholog per species is understandably rare, while there is no theoretical limit for an OG  
354 to gain new members. Comparing the two clades, Polyphaga has a higher rate of gene gain and six  
355 times more OGs with gains, and while the Adephaga rate of gene loss is higher, Polyphaga have 1.5  
356 times more OGs that have experienced gene losses. Hence, the gene repertoires of Polyphaga exhibit  
357 a more dynamic evolutionary history with more gains (rate) in more OGs (counts) and fewer losses  
358 (rate) spread out over more OGs (counts). It is possible that this greater dynamism may be generally  
359 linked to the greater species richness of Polyphaga, with no specific role for phytophagy underpinning  
360 this trend. However, among the candidate OGs for detoxification and digestion there are also more  
361 gains in Polyphaga, and, in contrast to the background, fewer losses. Thus, both gain and maintenance  
362 are higher for candidates in Polyphaga, which is consistent with a key role for phytophagy in driving  
363 dynamic gene repertoire evolution, and particularly LSEs.

364

#### 365 *Evidence for adaptive expansions of gene families involved in detoxification in polyphagan beetles*

366 In addition to observing more expansions among candidate OGs in the suborder Polyphaga, the positive  
367 results from the OUwie analysis support the hypothesis that selective pressures drive detoxification  
368 enzymes towards larger gene family sizes. This is especially pronounced for GSTs, for which half of  
369 the OGs tested positive and for which a significant enrichment compared to the background was found.  
370 The importance of GSTs in dietary shifts to phytophagy has been noted in mustard-feeding flies, where  
371 duplicated GSTs involved in the mercapturic acid pathway showed signatures of positive selection  
372 (Gloss et al., 2014). Our results therefore suggest that comparable phenomena have been acting at the  
373 level of polyphagan beetles. The CEs also show a statistically significant enrichment for positive results  
374 compared to the background, further supporting the diet detoxification hypothesis. The other positive  
375 results include a P450 OG and a CYS OG, neither of which led to a category enrichment compared to  
376 the background. The P450 OG is by far the largest among the positive results ([Supplementary Figure](#)  
377 [3](#)), highlighting the importance of P450s in beetle (and generally insect) physiology with diverse roles  
378 beyond detoxification, e.g. hormone biosynthesis (Kong et al., 2014). However, while considered as  
379 significantly expanded and under selection by our model, the actual mean values in the suborders are  
380 not dramatically different. Importantly, the enrichment of positive results among candidates still holds if  
381 this OG is excluded (see Supplementary Results). The involvement of P450s in many other processes

382 may explain why a broader difference between the suborders was not identified. Apart from one positive  
383 result among the cysteine proteases (no significant category enrichment), our study did not highlight  
384 additional expansions in other digestive enzymes or in transporters within a suborder. The lack of  
385 evidence for expansion in Polyphaga with respect to ABC transporters, which is the candidate functional  
386 category encompassing the highest number of OGs, may indicate that the ancestral diversity of  
387 transporters was sufficient for maintaining the excretion of toxins, despite variations in the substrates  
388 imposing a selective pressure on early stages of the detoxification pathway. Alternatively, if such  
389 pressure were acting on later stages of the pathway, i.e. transporters, its strength could have been too  
390 low for the detection power of our methods and data, unlike for GSTs or CEs.

391

### 392 *Conclusions*

393 By comparing the degree of expansion among gene families involved in detoxification of plant  
394 secondary compounds in two suborders of beetles characterized by generally contrasting trophic niches  
395 (i.e., Polyphaga contain a high proportion of phytophagous species while Adephaga encompass mostly  
396 predacious species), we provide molecular genetic evidence supporting the popular hypothesis that  
397 Coleoptera species richness may be in part explained by their interaction with land plants. Candidate  
398 OGs of GSTs, CEs, P450s, and CYs tested positive for adaptive LSEs in the phytophagous  
399 polyphagan beetle lineage, and categories of GSTs and CEs in particular, were enriched for OGs with  
400 such adaptive LSEs. Moreover, across all OGs tested, Polyphaga exhibited significantly more adaptive  
401 LSEs than Adephaga. This indicates that genes other than the candidate detoxification and digestion  
402 enzymes, which could include genes with functions less obviously related or unrelated to phytophagy,  
403 are also likely to have played a role in the adaptive success of Polyphaga. While this suggests that  
404 additional functional categories remain to be explored, contrasting gene family evolution across the two  
405 major suborders of beetles demonstrates a role for interactions with plant secondary compounds, and  
406 supports a role for phytophagy in general, as important drivers of the remarkable radiation of  
407 polyphagan beetles.

408

409

410

## 411 **Methods**

412 A chart summarizing the main steps of the analysis is available as [Supplementary Figure 10](#).

413

### 414 *Data sources*

415 This study included six genomes and 13 transcriptomes representing a balanced sampling of  
416 polyphagan and adepagan beetles, along with one representative of the sister group to Coleoptera,  
417 Strepsiptera, to root the species phylogeny. Annotated gene sets from four genomes were sourced from  
418 the i5k pilot project datasets (Robinson et al., 2011) (*Anoplophora glabripennis* v0.5.3 (McKenna et al.,  
419 2016), *Leptinotarsa decemlineata* v0.5.3 (Schoville et al., 2018), *Onthophagus taurus* v0.5.3, *Agrilus*  
420 *planipennis* v0.5.3) and two were independently published *Dendroctonus ponderosae* Ensembl  
421 Metazoa v1.0 (Keeling et al., 2013) and *Tribolium castaneum* Ensembl Metazoa v3.22 (Tribolium  
422 Genome Sequencing Consortium et al., 2008). One Polyphaga transcriptome, *Laparocerus tessellatus*  
423 (Supplementary Methods), was sequenced for this project and the others were provided by the 1KITE  
424 project (Supplementary Methods, <http://www.1kite.org>, Misof et al., 2014, Peters et al., 2017). A detailed  
425 list is presented in [Table 1](#).

426

### 427 *Coding sequence predictions, transcriptome and genome quality assessments*

428 Coding sequences and peptide sequences were predicted from all transcriptomes using TransDecoder  
429 (v2.0.1 <https://transdecoder.github.io> [last accessed May 4th, 2017]) along with a custom python script  
430 to retain the best-scoring entry among overlapping predictions. The coding sequences and peptide  
431 sequences from the genomes were retrieved from their official annotated gene sets. All genome and  
432 transcriptome gene sets were assessed using BUSCO (v2.0, python 3.4.1, dataset insecta\_odb9/2016-  
433 10-21, mode proteins) (Waterhouse et al., 2018). This tool identifies near-universal single-copy  
434 orthologs by using hidden Markov model profiles from amino acid alignments. CD-HIT-EST v4.6.1 (Li  
435 and Godzik, 2006) was run on the protein sequences with a 97.5 percent identity threshold to ensure  
436 that all species datasets were filtered to select a single isoform per gene.

437

### 438 *Orthology delineation*

439 The OrthoDB (Kriventseva et al., 2015) hierarchical orthology delineation procedure was employed to  
440 predict orthologous protein groups (OGs). Briefly, protein sequence alignments are assessed to identify

441 all best reciprocal hits (BRHs) between genes from each pair of species, which are then clustered into  
442 OGs following a graph-based approach that starts with BRH triangulation. The annotated proteins from  
443 the genomes of *A. planipennis*, *O. taurus* and all transcriptomes were mapped to OrthoDB v8 at the  
444 Arthropoda level (with 87 species including four of the beetles with sequenced genomes). Mapping  
445 uses the same BRH-based clustering procedure but only allows genes from mapped species to join  
446 existing OGs. These OGs were then filtered to identify the 9,720 OGs with representatives from both  
447 Polyphaga and Adephaga to focus the study on OGs with evolutionary histories traceable to the last  
448 common ancestor of all the beetles, i.e. 5,188 OGs with genes from only one of the two suborders were  
449 removed.

450

#### 451 *Species phylogeny*

452 To build an ultrametric phylogeny required for the CAFE analyses, the maximum likelihood molecular  
453 species phylogeny was first estimated based on the concatenated superalignment of orthologous amino  
454 acid sequences from each of the datasets. Protein sequences of single-copy BUSCO genes and the  
455 best-scoring duplicated genes present in all species were individually aligned for each set of BUSCO-  
456 identified orthologs using MAFFT with the --auto parameter (Kato and Standley, 2013) and each result  
457 was manually reviewed to exclude poor-quality alignments. Four hundred and five alignments were  
458 retained out of 436 and concatenated into a superalignment, partitioned according to the best model  
459 for each set of orthologs using aminosan 1.0.2015.01.23 (Tanabe, 2011). RAxML v8.1.2 (-f a -m  
460 PROTGAMMA -N 1000) (Stamatakis, 2014), and used to compute the maximum likelihood tree. The  
461 monophyly of Geadephaga and Hydradephaga was constrained to match the generally accepted  
462 resolution of Adephaga (as in McKenna et al., 2015). The chronos function of the R package ape (v3.4  
463 on R 3.2.1, relaxed model) (Paradis et al., 2004) was used to obtain an ultrametric tree and the tip to  
464 root length was adjusted to match the approximately 250 million year evolutionary history of crown  
465 group Coleoptera (McKenna et al., 2015).

466

#### 467 *Functional annotation and definition of candidate genes*

468 InterProScan was run on all species protein sets (-appl Pfam --goterms, 5.16.55) (Jones et al., 2014)  
469 to identify protein families. Additionally, blastp 2.3.0 (Altschul et al., 1997; Camacho et al., 2009) was  
470 run against uniref50 (version Jun 22, 2016; Suzek et al., 2015) with an e-value cut-off of 1e-20. An OG

471 was included in the set of candidate OGs when it had a match to both the uniref50 clusters and Pfam  
472 families (Finn et al., 2016) or gene ontologies (The Gene Ontology Consortium, 2017) as detailed in  
473 [Table 2](#).

474

#### 475 *CAFE analysis*

476 The number of genes in OGs for each species were counted. All candidates and remaining (control)  
477 OGs were pooled together and processed with CAFE 3.1 (Han et al., 2013), to infer gene family  
478 evolution in terms of gene gains and losses. First, the python script provided by CAFE was used to  
479 estimate the error in our dataset. The CAFE software was then run using the mode in which the gain  
480 and loss rates are estimated together ( $\lambda$ ) and a second mode in which they are estimated separately  
481 (gains= $\lambda$ , losses= $\mu$ ). The more complex model was retained as it reached a significantly better score (-  
482 199,989 for a single estimated parameter and -199,981 for two distinct estimated parameters,  $2x$  delta  
483 log-likelihood = 16, chi-squared distribution,  $df=1$ ). For the entire analysis, the CAFE overall p-value  
484 threshold was kept at its default value (0.01). To run CAFE on each suborder separately, the newick  
485 file was pruned to retain only required species using newick utils 1.1.0 (Junier and Zdobnov, 2010).

486

#### 487 *Evolutionary models*

488 To evaluate adaptive OG expansion, the likelihood of the count data was tested by optimizing  
489 parameters considering two methods provided by the OUwie R package v1.51 (Beaulieu and O'Meara,  
490 2016; Beaulieu et al., 2012). First, a Brownian motion (BM) approach was used, which assumes no  
491 selection and thus differences result from a stochastic process whose rate is estimated. Second,  
492 Ornstein-Uhlenbeck (OU) models were used. They take into account an optimal family size which is  
493 obtained by selective pressure. Two groups were defined in the phylogeny, namely Polyphaga and  
494 Adephaga, to which the two different regimes to consider were assigned, plus a third regime to the root.  
495 This represents a simplified scenario allowing for the comparison of gene contents between one group  
496 and the other rather than attempting to estimate 'levels' of phytophagy or zoophagy across the  
497 phylogeny. The models BM1 (Brownian motion with a single rate for the whole tree), BMS (Brownian  
498 motion with different rates for each group), OU1 (selection towards the same optimum for both groups)  
499 were optimized as null hypotheses ( $H_0$ ) and compared to OUM (selection towards two optima, same  
500 variance) and OUMV (selection towards two optima, two variances) models as alternative hypotheses

501 (H1). The Akaike information criterion corrected for sample-size (AICc) (Hurvich and Tsai, 1989) was  
502 used to compare models and an  $AICc > 2$  between the best H0 and the best H1 model was considered  
503 as significant to prefer the H1 model.

504

#### 505 *Statistical enrichment*

506 All results for candidates and controls were pooled together to obtain a background distribution of  
507 positive and negative results. Positive results are those OGs that passed the OUwie analysis, and  
508 negative results are all of the 9,720 OGs that did not obtain a significant overall CAFE p-value or did  
509 not pass the OUwie analysis. Then, 100,000 random draws (using the R function `sample`, without  
510 replacement) having the sample size of the candidate category to test for enrichment were taken from  
511 the background and the significant outcomes for Polyphaga and Adephaga were counted. A p-value  
512 was calculated for each group as follows: the number of random draws reaching the amount of  
513 significant outcomes found for the candidate category, or more, divided by 100,000. Additionally, the  
514 multiple tests conducted on each individual candidate category were corrected for false discovery rate  
515 (FDR) using the R `p.adjust` function (method BH, Benjamini Hochberg).

516

#### 517 *Gene trees*

518 The alignments for the gene trees were produced using MAFFT with the `--auto` parameter. The gene  
519 trees were computed with RAXML v8.1.2 (`-f a -m PROTGAMMALGF -N 100`) and plotted with EvoView  
520 (He et al., 2016; Zhang et al., 2012).

## 521 **Acknowledgements**

522 The authors thank Rolf Beutel, Adam Slipinski, Kai Schuette, Ralph Peters, and Eric Anton for providing  
523 specimens for the 1KITE samples, as well as Michael Balke, Jia Fenglong, Xu Shengquan, and  
524 Alexandros Vasilikopoulos for the *Sinaspidytes wrasei* data. The authors also thank Shanlin Liu,  
525 Alexander Donath, Lars Podsiadlowski, Karen Meusemann, and the 1KITE Coleoptera group for  
526 providing transcriptome assemblies of 1KITE species. The authors gratefully acknowledge pre-  
527 publication access to gene predictions for *Onthophagus taurus* and *Agrilus planipennis* from the Baylor  
528 College of Medicine Human Genome Sequencing Center's i5k pilot project, represented by Stephen  
529 Richards. The authors additionally thank Catherine Berney who contributed to the production of the  
530 *Laparocerus tessellatus* transcriptome, and Nicolas Salamin for advice on the applied methods and  
531 feedback on the manuscript.

532  
533 This work was supported by the United States National Science Foundation (DEB 1355169) and the  
534 United States Department of Agriculture (cooperative agreement 8130-0547-CA) to DDM, the Spanish  
535 grant CGL2013-42589-P, awarded by the MINECO and co-financed by FEDER to BCE, the Science  
536 Foundation DFG grant BA2152/11-1, 2, the BGI-Shenzhen, the China National Genebank, and the  
537 following Swiss National Science Foundation grants: 31003A\_143936 (PI), 31003A\_173048 (MRR),  
538 PP00P3\_170664 (RMW), PP00P3\_144870 (NA) and PP00P3\_172899 (NA). Funding for open access  
539 charge: Museum of Natural History of Geneva.

540  
541 Some of the computations were performed at the Vital-IT (<http://www.vital-it.ch>) center for high-  
542 performance computing of the Swiss Institute of Bioinformatics.

## 543 544 **Author Contributions**

545 MS and NA conceived the study. PI delineated orthology. CP prepared the libraries for *L. tessellatus*  
546 transcriptome sequencing. HEE, DDM, BM, SS, and XZ provided access to 1KITE transcriptome data.  
547 MS conducted the analyses. BCE, MRR, JR, RMW and NA supervised the analyses. MS, RMW, and  
548 NA wrote the manuscript, with input from all authors.



## 549 References

- Altschul, S.F., Madden, T.L., Schäffer, A.A., Zhang, J., Zhang, Z., Miller, W., and Lipman, D.J. (1997). Gapped BLAST and PSI-BLAST: a new generation of protein database search programs. *Nucleic Acids Res.* *25*, 3389–3402.
- Barraclough, T.G., Barclay, M.V., and Vogler, A.P. (1998). Species richness: does flower power explain beetle-mania? *Curr. Biol. CB* *8*, R843-845.
- Barrick, J.E., and Lenski, R.E. (2013). Genome dynamics during experimental evolution. *Nat. Rev. Genet.* *14*, 827–839.
- Beaulieu, J.M., and O'Meara, B. (2016). OUwie: Analysis of Evolutionary Rates in an OU Framework.
- Beaulieu, J.M., Jhvueng, D.-C., Boettiger, C., and O'Meara, B.C. (2012). Modeling Stabilizing Selection: Expanding the Ornstein–Uhlenbeck Model of Adaptive Evolution. *Evolution* *66*, 2369–2383.
- Betz, O., Thayer, M.K., and Newton, A.F. (2003). Comparative morphology and evolutionary pathways of the mouthparts in spore-feeding Staphylinidae (Coleoptera). *Acta Zool.* *84*, 179–238.
- Brito, N.F., Moreira, M.F., and Melo, A.C.A. (2016). A look inside odorant-binding proteins in insect chemoreception. *J. Insect Physiol.* *95*, 51–65.
- Camacho, C., Coulouris, G., Avagyan, V., Ma, N., Papadopoulos, J., Bealer, K., and Madden, T.L. (2009). BLAST+: architecture and applications. *BMC Bioinformatics* *10*, 421.
- De Bie, T., Cristianini, N., Demuth, J.P., and Hahn, M.W. (2006). CAFE: a computational tool for the study of gene family evolution. *Bioinformatics* *22*, 1269–1271.
- Farrell, B.D. (1998). “Inordinate Fondness” explained: why are there So many beetles? *Science* *281*, 555–559.
- Finn, R.D., Coghill, P., Eberhardt, R.Y., Eddy, S.R., Mistry, J., Mitchell, A.L., Potter, S.C., Punta, M., Qureshi, M., Sangrador-Vegas, A., et al. (2016). The Pfam protein families database: towards a more sustainable future. *Nucleic Acids Res.* *44*, D279–D285.
- Francino, M.P. (2005). An adaptive radiation model for the origin of new gene functions. *Nat. Genet.* *37*, 573–577.
- Gloss, A.D., Vassão, D.G., Hailey, A.L., Nelson Dittrich, A.C., Schramm, K., Reichelt, M., Rast, T.J., Weichsel, A., Cravens, M.G., Gershenzon, J., et al. (2014). Evolution in an ancient detoxification pathway is coupled with a transition to herbivory in the drosophilidae. *Mol. Biol. Evol.* *31*, 2441–2456.
- Goldman-Huertas, B., Mitchell, R.F., Lapoint, R.T., Faucher, C.P., Hildebrand, J.G., and Whiteman, N.K. (2015). Evolution of herbivory in Drosophilidae linked to loss of behaviors, antennal responses, odorant receptors, and ancestral diet. *Proc. Natl. Acad. Sci. U. S. A.* *112*, 3026–3031.
- Grimaldi, D. (1999). The Co-Radiations of Pollinating Insects and Angiosperms in the Cretaceous. *Ann. Mo. Bot. Gard.* *86*, 373.
- Grimaldi, D.A., and Engel, M.S. (2005). *Evolution of the insects* (Cambridge [U.K.]; New York: Cambridge University Press).
- Hahn, M.W., Han, M.V., and Han, S.-G. (2007). Gene Family Evolution across 12 Drosophila Genomes. *PLoS Genet.* *3*, e197.
- Han, M.V., Thomas, G.W.C., Lugo-Martinez, J., and Hahn, M.W. (2013). Estimating gene gain and loss rates in the presence of error in genome assembly and annotation using CAFE 3. *Mol. Biol. Evol.* *30*,



1987–1997.

He, Z., Zhang, H., Gao, S., Lercher, M.J., Chen, W.-H., and Hu, S. (2016). Evolview v2: an online visualization and management tool for customized and annotated phylogenetic trees. *Nucleic Acids Res.* *44*, W236–W241.

Hunt, T., Bergsten, J., Levkanicova, Z., Papadopoulou, A., John, O.S., Wild, R., Hammond, P.M., Ahrens, D., Balke, M., Caterino, M.S., et al. (2007). A comprehensive phylogeny of beetles reveals the evolutionary origins of a superradiation. *Science* *318*, 1913–1916.

Hurst, L.D. (2009). Fundamental concepts in genetics: genetics and the understanding of selection. *Nat. Rev. Genet.* *10*, 83–93.

Hurvich, C.M., and Tsai, C.-L. (1989). Regression and time series model selection in small samples. *Biometrika* *76*, 297–307.

Innan, H., and Kondrashov, F. (2010). The evolution of gene duplications: classifying and distinguishing between models. *Nat. Rev. Genet.* *11*, 97–108.

Jones, P., Binns, D., Chang, H.-Y., Fraser, M., Li, W., McAnulla, C., McWilliam, H., Maslen, J., Mitchell, A., Nuka, G., et al. (2014). InterProScan 5: genome-scale protein function classification. *Bioinforma. Oxf. Engl.* *30*, 1236–1240.

Junier, T., and Zdobnov, E.M. (2010). The Newick utilities: high-throughput phylogenetic tree processing in the UNIX shell. *Bioinforma. Oxf. Engl.* *26*, 1669–1670.

Katoh, K., and Standley, D.M. (2013). MAFFT multiple sequence alignment software version 7: improvements in performance and usability. *Mol. Biol. Evol.* *30*, 772–780.

Keeling, C.I., Yuen, M.M.S., Liao, N.Y., Docking, T.R., Chan, S.K., Taylor, G.A., Palmquist, D.L., Jackman, S.D., Nguyen, A., Li, M., et al. (2013). Draft genome of the mountain pine beetle, *Dendroctonus ponderosae* Hopkins, a major forest pest. *Genome Biol.* *14*, R27.

Kondrashov, F.A. (2012). Gene duplication as a mechanism of genomic adaptation to a changing environment. *Proc. R. Soc. B Biol. Sci.* *279*, 5048–5057.

Kong, Y., Liu, X.-P., Wan, P.-J., Shi, X.-Q., Guo, W.-C., and Li, G.-Q. (2014). The P450 enzyme Shade mediates the hydroxylation of ecdysone to 20-hydroxyecdysone in the Colorado potato beetle, *Leptinotarsa decemlineata*. *Insect Mol. Biol.* *23*, 632–643.

Kriventseva, E.V., Tegenfeldt, F., Petty, T.J., Waterhouse, R.M., Simão, F.A., Pozdnyakov, I.A., Ioannidis, P., and Zdobnov, E.M. (2015). OrthoDB v8: update of the hierarchical catalog of orthologs and the underlying free software. *Nucleic Acids Res.* *43*, D250-256.

Labandeira, C.C. (1997). INSECT MOUTHPARTS: Ascertaining the Paleobiology of Insect Feeding Strategies. *Annu. Rev. Ecol. Syst.* *28*, 153–193.

Labandeira, C.C. (2002). The history of associations between plants and animals. In: Herrera, C. M., Pellmyr, O.M. (Eds.), *Plant-Animal Interactions: An Evolutionary Approach*, London.

Labandeira, C.C. (2013). Deep-time patterns of tissue consumption by terrestrial arthropod herbivores. *Naturwissenschaften* *100*, 355–364.

Leschen, R.A.B., and Buckley, T.R. (2007). Multistate characters and diet shifts: evolution of Erotylidae (Coleoptera). *Syst. Biol.* *56*, 97–112.

Li, D., and Zhang, J. (2014). Diet shapes the evolution of the vertebrate bitter taste receptor gene repertoire. *Mol. Biol. Evol.* *31*, 303–309.

Li, W., and Godzik, A. (2006). Cd-hit: a fast program for clustering and comparing large sets of protein or nucleotide sequences. *Bioinforma. Oxf. Engl.* 22, 1658–1659.

McKenna, D.D., Sequeira, A.S., Marvaldi, A.E., and Farrell, B.D. (2009). Temporal lags and overlap in the diversification of weevils and flowering plants. *Proc. Natl. Acad. Sci. U. S. A.* 106, 7083–7088.

McKenna, D.D., Wild, A.L., Kanda, K., Bellamy, C.L., Beutel, R.G., Caterino, M.S., Farnum, C.W., Hawks, D.C., Ivie, M.A., Jameson, M.L., et al. (2015). The beetle tree of life reveals that Coleoptera survived end-Permian mass extinction to diversify during the Cretaceous terrestrial revolution: Phylogeny and evolution of Coleoptera (beetles). *Syst. Entomol.* 40, 835–880.

McKenna, D.D., Scully, E.D., Pauchet, Y., Hoover, K., Kirsch, R., Geib, S.M., Mitchell, R.F., Waterhouse, R.M., Ahn, S.-J., Arsala, D., et al. (2016). Genome of the Asian longhorned beetle (*Anoplophora glabripennis*), a globally significant invasive species, reveals key functional and evolutionary innovations at the beetle-plant interface. *Genome Biol.* 17, 227.

Misof, B., Liu, S., Meusemann, K., Peters, R.S., Donath, A., Mayer, C., Frandsen, P.B., Ware, J., Flouri, T., Beutel, R.G., et al. (2014). Phylogenomics resolves the timing and pattern of insect evolution. *Science* 346, 763–767.

Neafsey, D.E., Waterhouse, R.M., Abai, M.R., Aganezov, S.S., Alekseyev, M.A., Allen, J.E., Amon, J., Arcà, B., Arensburger, P., Artemov, G., et al. (2015). Highly evolvable malaria vectors: The genomes of 16 *Anopheles* mosquitoes. *Science* 347, 1258522.

Niehuis, O., Hartig, G., Grath, S., Pohl, H., Lehmann, J., Tafer, H., Donath, A., Krauss, V., Eisenhardt, C., Hertel, J., et al. (2012). Genomic and morphological evidence converge to resolve the enigma of Strepsiptera. *Curr Biol.* 22, 1309–1313.

Paradis, E., Claude, J., and Strimmer, K. (2004). APE: Analyses of Phylogenetics and Evolution in R language. *Bioinforma. Oxf. Engl.* 20, 289–290.

Parsons, K.J., Concannon, M., Navon, D., Wang, J., Ea, I., Groveas, K., Campbell, C., and Albertson, R.C. (2016). Foraging environment determines the genetic architecture and evolutionary potential of trophic morphology in cichlid fishes. *Mol. Ecol.* 25, 6012–6023.

Pauchet, Y., Wilkinson, P., Chauhan, R., and French-Constant, R.H. (2010). Diversity of Beetle Genes Encoding Novel Plant Cell Wall Degrading Enzymes. *PLOS ONE* 5, e15635.

Peters, R.S., Krogmann, L., Mayer, C., Donath, A., Gunkel, S., Meusemann, K., Kozlov, A., Podsiadlowski, L., Petersen, M., Lanfear, R., et al. (2017). Evolutionary History of the Hymenoptera. *Curr Biol.* 27, 1013–1018.

Ragsdale, E.J., Müller, M.R., Rödelsperger, C., and Sommer, R.J. (2013). A developmental switch coupled to the evolution of plasticity acts through a sulfatase. *Cell* 155, 922–933.

Robinson, G.E., Hackett, K.J., Purcell-Miramontes, M., Brown, S.J., Evans, J.D., Goldsmith, M.R., Lawson, D., Okamuro, J., Robertson, H.M., and Schneider, D.J. (2011). Creating a Buzz About Insect Genomes. *Science* 331, 1386–1386.

Roncalli, V., Cieslak, M.C., Passamaneck, Y., Christie, A.E., and Lenz, P.H. (2015). Glutathione S-Transferase (GST) Gene Diversity in the Crustacean *Calanus finmarchicus* – Contributors to Cellular Detoxification. *PLOS ONE* 10, e0123322.

Schoville, S.D., Chen, Y.H., Andersson, M.N., Benoit, J.B., Bhandari, A., Bowsher, J.H., Brevik, K., Cappelle, K., Chen, M.-J.M., Childers, A.K., et al. (2018). A model species for agricultural pest genomics: the genome of the Colorado potato beetle, *Leptinotarsa decemlineata* (Coleoptera: Chrysomelidae). *Sci. Rep.* 8, 1931.

Seehausen, O., Butlin, R.K., Keller, I., Wagner, C.E., Boughman, J.W., Hohenlohe, P.A., Peichel, C.L., Saetre, G.-P., Bank, C., Brännström, A., et al. (2014). Genomics and the origin of species. *Nat. Rev. Genet.* *15*, 176–192.

Shaw, K.L., and Lesnick, S.C. (2009). Genomic linkage of male song and female acoustic preference QTL underlying a rapid species radiation. *Proc. Natl. Acad. Sci. U. S. A.* *106*, 9737–9742.

Simão, F.A., Waterhouse, R.M., Ioannidis, P., Kriventseva, E.V., and Zdobnov, E.M. (2015). BUSCO: assessing genome assembly and annotation completeness with single-copy orthologs. *Bioinformatics* *31*, 3210–3212.

Slipinski, S.A., Leschen, R.A.B., and Lawrence, J.F. (2011). Order Coleoptera Linnaeus, 1758. In: Zhang, Z.-Q. (Ed.) *Animal biodiversity: An outline of higher-level classification and survey of taxonomic richness*. 6.

Stamatakis, A. (2014). RAxML version 8: a tool for phylogenetic analysis and post-analysis of large phylogenies. *Bioinforma. Oxf. Engl.* *30*, 1312–1313.

Suchan, T., and Alvarez, N. (2015). Fifty years after Ehrlich and Raven, is there support for plant–insect coevolution as a major driver of species diversification? *Entomol. Exp. Appl.* *157*, 98–112.

Suzek, B.E., Wang, Y., Huang, H., McGarvey, P.B., Wu, C.H., and UniProt Consortium (2015). UniRef clusters: a comprehensive and scalable alternative for improving sequence similarity searches. *Bioinforma. Oxf. Engl.* *31*, 926–932.

Tanabe, A.S. (2011). Kakusan4 and Aminosan: two programs for comparing nonpartitioned, proportional and separate models for combined molecular phylogenetic analyses of multilocus sequence data. *Mol. Ecol. Resour.* *11*, 914–921.

The Gene Ontology Consortium (2017). Expansion of the Gene Ontology knowledgebase and resources. *Nucleic Acids Res.* *45*, D331–D338.

Tribolium Genome Sequencing Consortium, Richards, S., Gibbs, R.A., Weinstock, G.M., Brown, S.J., Denell, R., Beeman, R.W., Gibbs, R., Beeman, R.W., Brown, S.J., et al. (2008). The genome of the model beetle and pest *Tribolium castaneum*. *Nature* *452*, 949–955.

Voelckel, C., and Jander, G. (2014). *Annual Plant Reviews, Insect-Plant Interactions*.

Waterhouse, R.M. (2015). A maturing understanding of the composition of the insect gene repertoire. *Curr. Opin. Insect Sci.* *7*, 15–23.

Waterhouse, R.M., Zdobnov, E.M., and Kriventseva, E.V. (2011). Correlating traits of gene retention, sequence divergence, duplicability and essentiality in vertebrates, arthropods, and fungi. *Genome Biol. Evol.* *3*, 75–86.

Waterhouse, R.M., Seppey, M., Simão, F.A., Manni, M., Ioannidis, P., Klioutchnikov, G., Kriventseva, E.V., and Zdobnov, E.M. (2018). BUSCO Applications from Quality Assessments to Gene Prediction and Phylogenomics. *Mol. Biol. Evol.* *35*, 543–548.

Zhang, H., Gao, S., Lercher, M.J., Hu, S., and Chen, W.-H. (2012). EvolView, an online tool for visualizing, annotating and managing phylogenetic trees. *Nucleic Acids Res.* *40*, W569–W572.

Zhang, S.-Q., Che, L.-H., Li, Y., Liang, D., Pang, H., Ślipiński, A., and Zhang, P. (2018). Evolutionary history of Coleoptera revealed by extensive sampling of genes and species. *Nat. Commun.* *9*, 205.
